# Supplementary material for: Discovery of deep-sea coral symbionts from a novel clade of marine bacteria with severely reduced genomes
Source: Springer Nature journal article supplement (doi:10.1038/s41467-024-53855-5), 2024-11-04
Supplement: MOESM1 [file 41467_2024_53855_MOESM1_ESM.pdf]

## **Supplemental Information for:**

### **Discovery of deep-sea coral symbionts from a novel clade of marine bacteria with severely reduced genomes**

Samuel A. Vohsen, Harald R. Gruber-Vodicka, Santiago Herrera,

Nicole Dubilier, Charles R. Fisher, Iliana B. Baums\*

\*Corresponding Author: [Iliana.baums@hifmb.de](mailto:Iliana.baums@hifmb.de)

#### **Table of Contents**

|                                |             |
|--------------------------------|-------------|
| <b>Supplementary Table S1</b>  | Page 2      |
| <b>Supplementary Table S2</b>  | Page 3      |
| <b>Supplementary Table S3</b>  | Page 4      |
| <b>Supplementary Table S4</b>  | Page 5      |
| <b>Supplementary Figure S1</b> | Page 6      |
| <b>Supplementary Note 1</b>    | Page 7      |
| <b>Supplementary Figure S2</b> | Page 8      |
| <b>Supplementary Figure S3</b> | Page 9      |
| <b>Supplementary Figure S4</b> | Page 10     |
| <b>Supplementary Figure S5</b> | Pages 11-12 |

Table S1: Collection year, sampling site, preservation method, and extraction procedure for coral, water, and sediment samples used in 16S rRNA amplicon sequencing. All samples were flash frozen and extracted with powersoil kits unless otherwise noted. Underlined sample numbers indicate preservation in ethanol. A star indicates sample numbers extracted with allprep kits. Where colonies were sampled multiple times, parentheses indicate the number of colonies represented. Brackets indicate the number of colonies where subsamples were processed with both powersoil and allprep kits. Italics indicate water samples from niskin bottles processed with powerwater kits. A carrot indicates water samples using a McLane pump and the filter was both preserved in ethanol and frozen.

| Sample Type         | Year | Site  |       |           |       |            |           |       |       |
|---------------------|------|-------|-------|-----------|-------|------------|-----------|-------|-------|
|                     |      | GB299 | VK862 | MC751     | VK826 | GC234      | MC885     | GC249 | GC290 |
| <i>C. americana</i> | 2010 | 2*[1] | 2*    | -         | -     | -          | -         | -     | -     |
| <i>C. delta</i>     | 2015 | -     | -     | <u>11</u> | -     | <u>5</u>   | <u>12</u> | -     | -     |
|                     | 2016 | -     | -     | 6         | 3     | 15         | 17 (14)   | -     | -     |
|                     | 2017 | -     | -     | 19 (9)    | -     | 20 (18)[5] | -         | 14    | 10    |
| Sediment            | 2015 | -     | -     | 6         | -     | 1          | 6         | -     | -     |
|                     | 2016 | -     | -     | 4         | 2     | 8          | 5         | -     | -     |
|                     | 2017 | -     | -     | 5         | -     | 4          | -         | 3     | -     |
| Water               | 2015 | -     | -     | 1^        | -     | 1^         | -         | -     | -     |
|                     | 2016 | -     | -     | -         | -     | 6          | 5         | -     | -     |
|                     | 2017 | -     | -     | 6         | -     | 3          | 3         | 1     | -     |

Table S2: Metadata of samples used for metagenomics and microscopy. Numbers indicate the year that the sample was collected that was used for each analysis. Underlining indicates which microscopy samples bacteria were detected in. PE = paired-end sequencing

| Site  | Colony Name | Metagenomes     |            |            | Meta-transcriptome | FISH      | TEM       |
|-------|-------------|-----------------|------------|------------|--------------------|-----------|-----------|
|       |             | Deep (150bp PE) | (150bp PE) | (100bp PE) |                    |           |           |
| MC751 | E7-2        | -               | -          | 17         | -                  | -         | -         |
|       | E7-4        | -               | -          | 16         | -                  | -         | -         |
|       | E7-6        | -               | -          | 15         | -                  | -         | -         |
|       | E7-8        | -               | -          | 16         | -                  | -         | -         |
|       | S11-1       | -               | -          | 17         | -                  | -         | <u>17</u> |
|       | S11-3       | -               | -          | 17         | -                  | -         | <u>17</u> |
|       | S11-9       | -               | 16         | 16         | 16                 | <u>16</u> | -         |
|       | S14-2       | 16              | 16         | -          | -                  | <u>16</u> | -         |
|       | S14-3       | -               | -          | 17         | -                  | -         | -         |
|       | S14-4       | -               | -          | 17         | -                  | -         | -         |
|       | S14-5       | -               | 16         | 16         | -                  | -         | -         |
|       | S17-1       | -               | -          | 17         | -                  | -         | <u>17</u> |
|       | S17-3       | -               | -          | 15         | -                  | -         | -         |
|       | S17-4       | -               | 16         | 16         | -                  | -         | -         |
|       | T4-4        | -               | -          | 17         | -                  | -         | <u>17</u> |
|       | T4-6        | -               | -          | 17         | -                  | -         | <u>17</u> |
| MC885 | S31-1       | -               | -          | 16         | -                  | -         | -         |
|       | S31-2       | -               | -          | 16         | -                  | -         | -         |
|       | S31-3       | -               | 16         | 16         | -                  | <u>16</u> | -         |
|       | S3-14       | 16              | 16         | -          | 16                 | <u>16</u> | -         |
| GC234 | S33-16      | -               | 16         | -          | -                  | 16        | -         |
|       | S34-11      | -               | 16         | -          | -                  | -         | 17        |

Table S3: Distances between *Callogorgia* samples. The minimum distances between *Callogorgia* samples from different sites are presented in kilometers at the top of the table. The final row displays the maximum distance between *Callogorgia* samples collected within a site.

|                       | GB299  | GC234  | GC290  | GC249  | MC751  | MC885  | VK862  | VK826  |
|-----------------------|--------|--------|--------|--------|--------|--------|--------|--------|
| GB299                 | -      | 108 km | 155 km | 168 km | 244 km | 250 km | 407 km | 443 km |
| GC234                 | 108 km | -      | 57 km  | 70 km  | 148 km | 152 km | 308 km | 350 km |
| GC290                 | 155 km | 57 km  | -      | 14 km  | 100 km | 100 km | 272 km | 304 km |
| GC249                 | 168 km | 70 km  | 14 km  | -      | 88 km  | 87 km  | 259 km | 291 km |
| MC751                 | 244 km | 148 km | 100 km | 88 km  | -      | 16 km  | 172 km | 204 km |
| MC885                 | 250 km | 152 km | 100 km | 87 km  | 16 km  | -      | 175 km | 204 km |
| VK862                 | 407 km | 308 km | 272 km | 259 km | 172 km | 175 km | -      | 37 km  |
| VK826                 | 443 km | 350 km | 304 km | 291 km | 204 km | 204 km | 37 km  | -      |
| max<br>within<br>site | 0 m    | 223 m  | 180 m  | 32 m   | 177 m  | 1514 m | 97 m   | 70 m   |

Table S4: Primer sequences used for PCR and FISH microscopy. Linkers are underlined.

| Primer Name       | Sequence (5' – 3')                                 | Use  |
|-------------------|----------------------------------------------------|------|
| 27F + CS1 linker  | <u>ACACTGACGACATGGTTCTACA</u> AGAGTTTGATCMTGGCTCAG | PCR  |
| 355R + CS2 linker | <u>TACGGTAGCAGAGACTTGGTCTGCTGCCTCCCGTAGGAGT</u>    | PCR  |
| EUB338 I          | GCTGCCTCCCGTAGGAGT                                 | FISH |
| EUB338 II         | GCAGCCACCCGTAGGTGT                                 | FISH |
| EUB338 III        | GCTGCCACCCGTAGGTGT                                 | FISH |

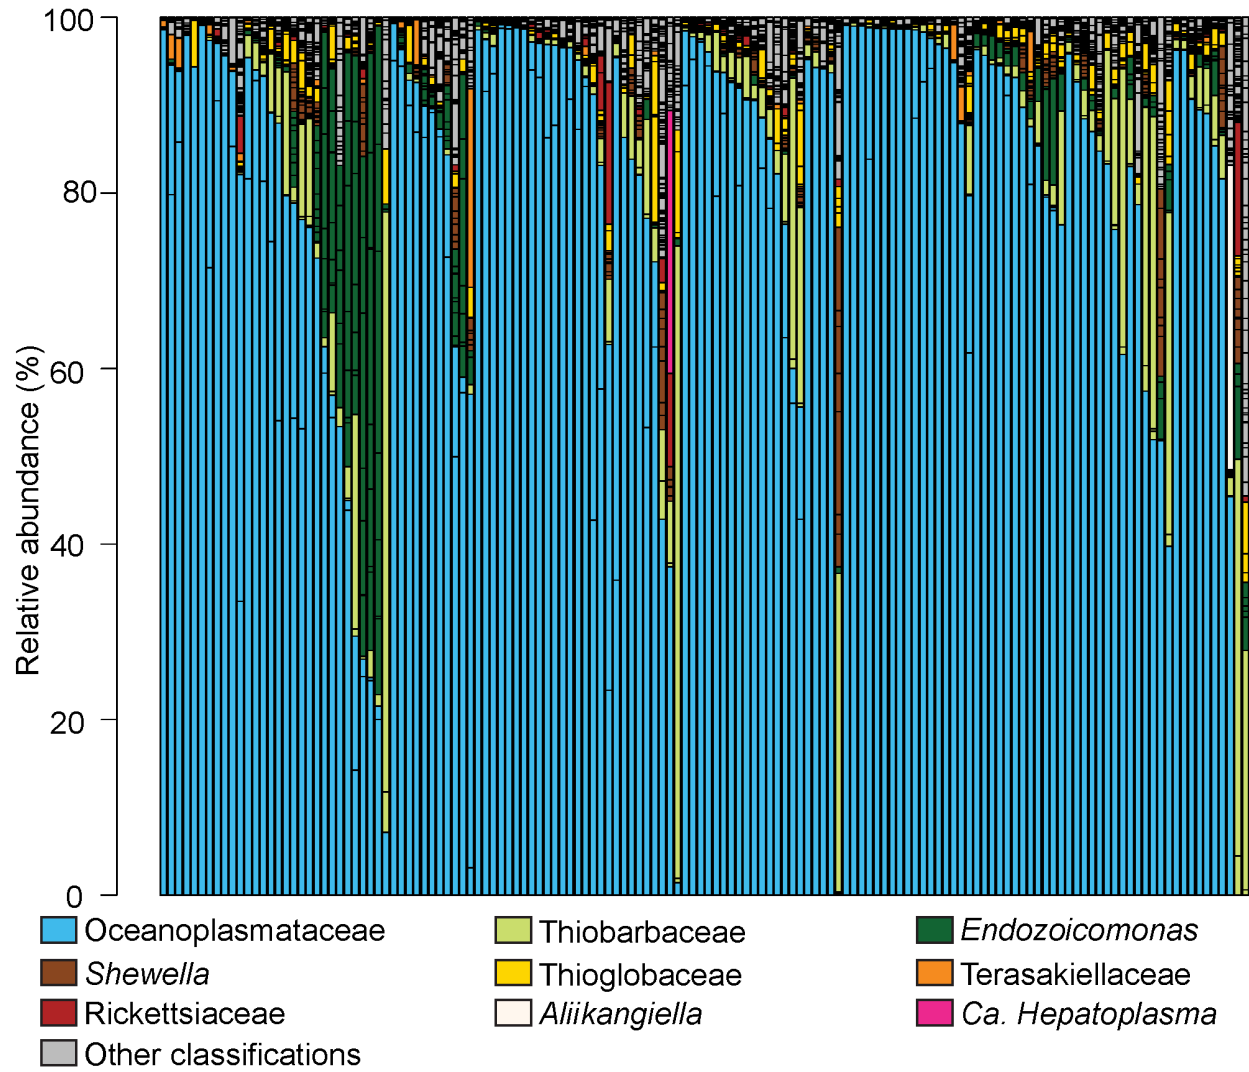

Fig. S1: Other microbes detected in *Callogorgia*

Barplots of all ASVs detected in *Callogorgia* samples based on 16S rRNA amplicon sequencing. ASVs from nine most abundant taxa are represented in colors. ASVs with other classifications are displayed in gray. Each column represents the microbial community of a single sample. Colonies are organized by species, site, and sampling year. *C. delta* sites are ordered left to right by increasing depth.

### Supplementary Note 1

To investigate the possibility that sediment samples were contaminated with *Ca. Oceanoplasma callogorgiae* and *Ca. Thalassoplasma callogorgiae*, we screened an additional forty sediment samples from sites lacking *Callogorgia* that were sequenced on the same runs. These samples span a range of depths from 60 to 1800 meters and include four from mesophotic sites. The metadata associated with these samples can be found in Supplementary File 1: Tab A. ASVs Molli-1 and Molli-3 were detected in many sediment samples from sites without *Callogorgia* (Fig. S2a, Supplementary File 1: Tab A). On the first sequencing run, Molli-1 was detected in every sediment sample (mean  $0.65\% \pm 0.19$  sd, mean 19 reads  $\pm 5.0$ , 24 from sites with *Callogorgia*, 14 from sites without) whereas it was detected in only 20 of 45 samples from the second sequencing run and was less abundant when present (mean  $0.12\% \pm 0.16$ , mean 2.7 reads  $\pm 1.4$ , present in 10/19 with *Callogorgia*, 10/26 without). Molli-3 was only detected in sediment samples from the first sequencing run (13 of 38) where up to 3 reads were detected.

Sediment from sites with *Callogorgia* did not contain a higher abundance of Molli-1 sequences on either run (Fig. S2b). All four mesophotic sediment samples were sequenced on the second sequencing run and two contained Molli-1 sequences (2 and 4 reads). Molli-1 was detected in three out of four sequencing blanks ( $\leq 5$  reads, Fig. S2c).

No novel mollicute ASV was detected in any water sample. All water samples were sequenced on a third run that contained no coral samples nor any sediment.

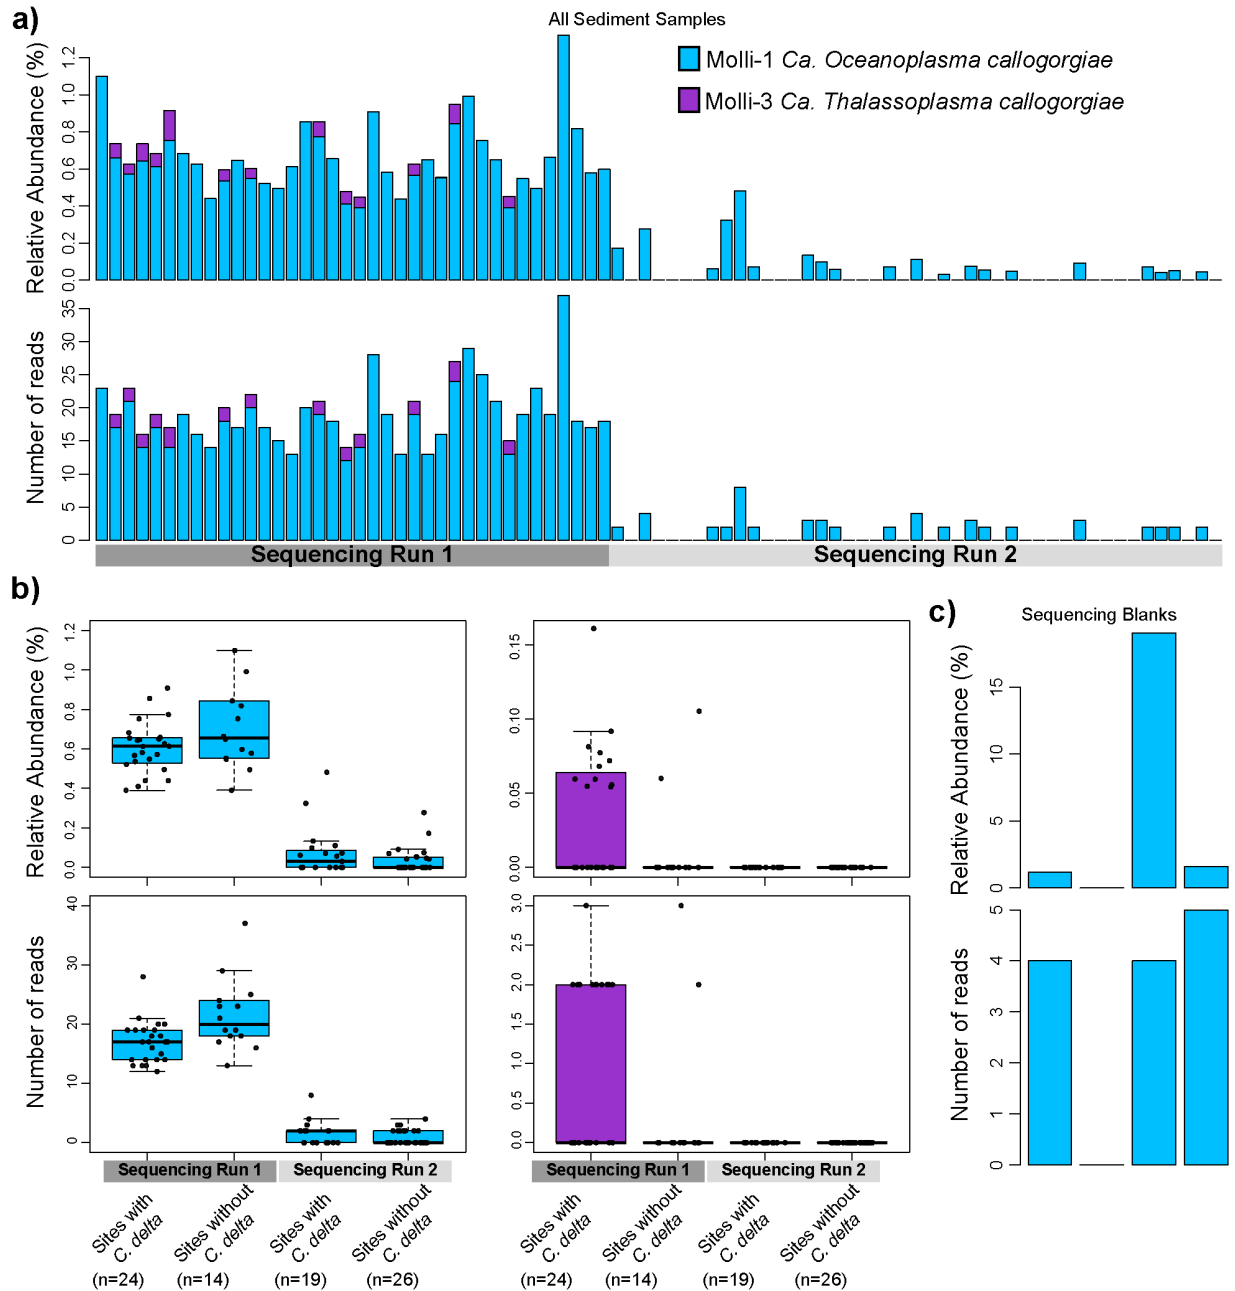

Fig. S2: Oceanoplasmataceae in sediment samples and blanks

a) Barplots showing the presence of Oceanoplasmataceae ASVs across all sediment samples ordered by increasing depth within sequencing run. Both the relative abundance and total number of reads are shown. b) Comparisons of the abundance of *Ca. O. callogorgiae* (left) and *Ca. T. callogorgiae* (right) between sediment samples from sites with *C. delta* and sites without *C. delta* showing no detectable difference. Boxes of boxplots display the 1<sup>st</sup> quartile, median, and 3<sup>rd</sup> quartile while whiskers display the minimum and maximum. All points were additionally superimposed over boxes with randomized jittering along the x-axis. c) Abundance of *Ca. O. callogorgiae* in four sequencing blanks.



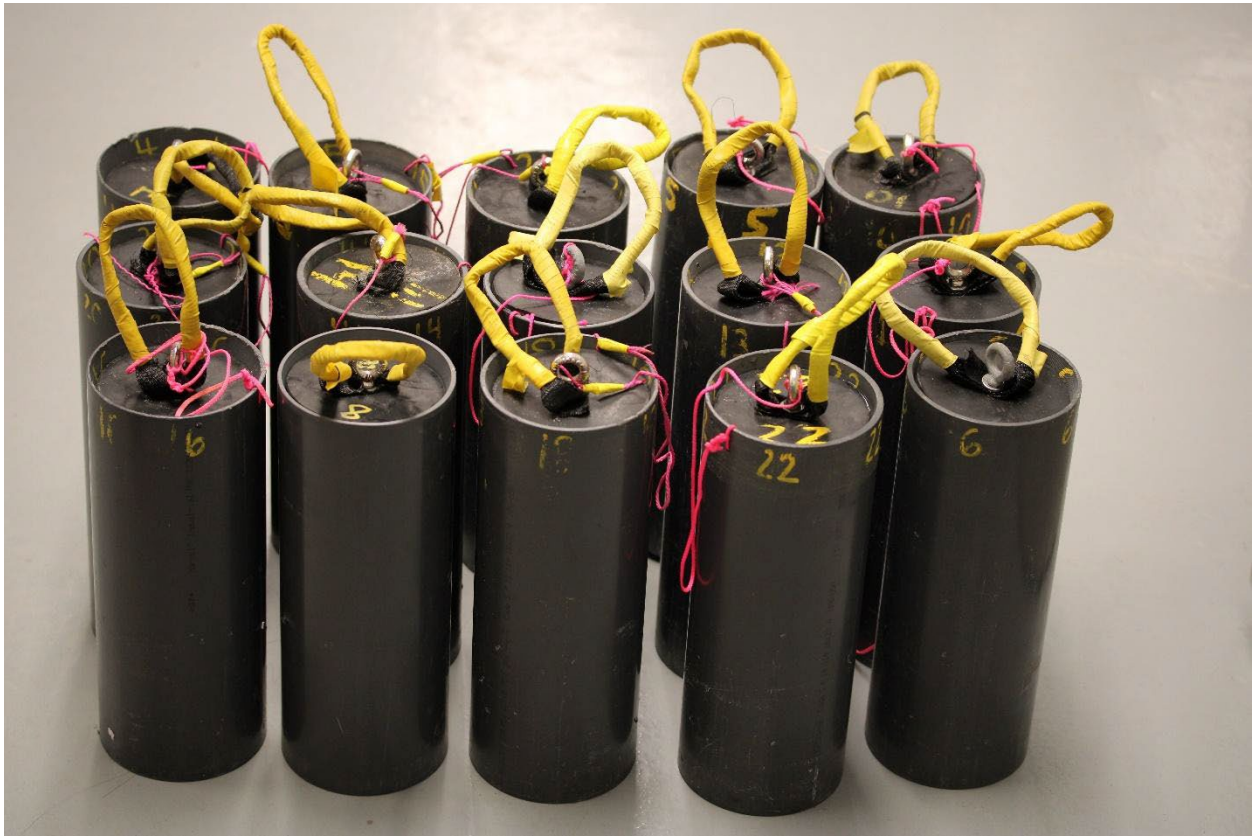

Fig. S3: Image of coral quivers

Coral quivers and bioboxes were used to collect corals in situ until ROV recovery. Details about the bioboxes and coral cutters used can be found at the following links.

ROV Hercules (Ocean Exploration Trust):

Biobox: <https://nautiluslive.org/tech/rov-hercules>

Coral cutters: <https://sketchfab.com/3d-models/coral-cutters-728afa87f62a4693aa4ec38e0e537d19>

ROV Global Explorer (Oceaneering):

Biobox: <https://oceanexplorer.noaa.gov/explorations/15biolum/background/global-explorer/global-explorer.html>

<https://oceanexplorer.noaa.gov/explorations/15biolum/background/global-explorer/media/biobox.html>

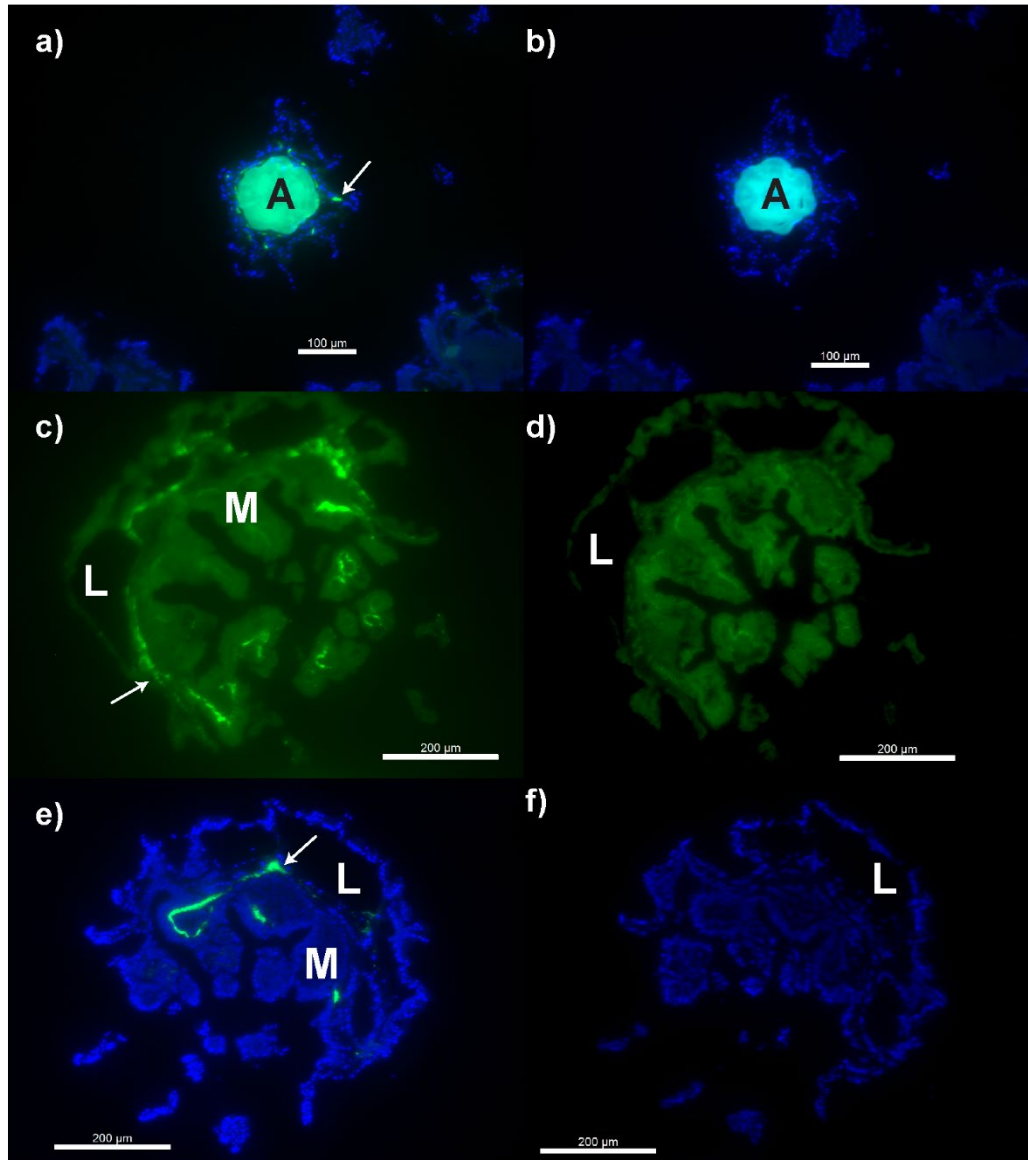

Fig. S4: Comparison of adjacent tissue sections of *Callogorgia delta*

Tissue sections were hybridized using CARD-FISH with the general eubacterial probe mix (EUB338 I-III) and DNA was stained with DAPI. Fluorescence in the emission range of DAPI is shown in blue while green shows emission in the range of the fluorophore ALEXA 488 used by both EUB338 I-III and control probes. Paired images compare adjacent sections where sections on the left were hybridized with EUB338 I-III and show bacterial signals (a,c,e) while sections on the right were hybridized with a negative control probe and only show autofluorescence in green (b,d,f). Signals were observed in transverse sections through the central axis (a,b) and transverse sections through a single polyp (c,d,e,f). Arrows in (a) and (c) show examples of EUB338 I-III fluorescence. This pattern was observed in 4 of 5 colonies. A = central axis, G = gastrovascular cavity, M = gastric mesentery, L = sclerite lacuna. Scale bars = 100  $\mu$ m (a,b,g), 200  $\mu$ m (c,d,e,)

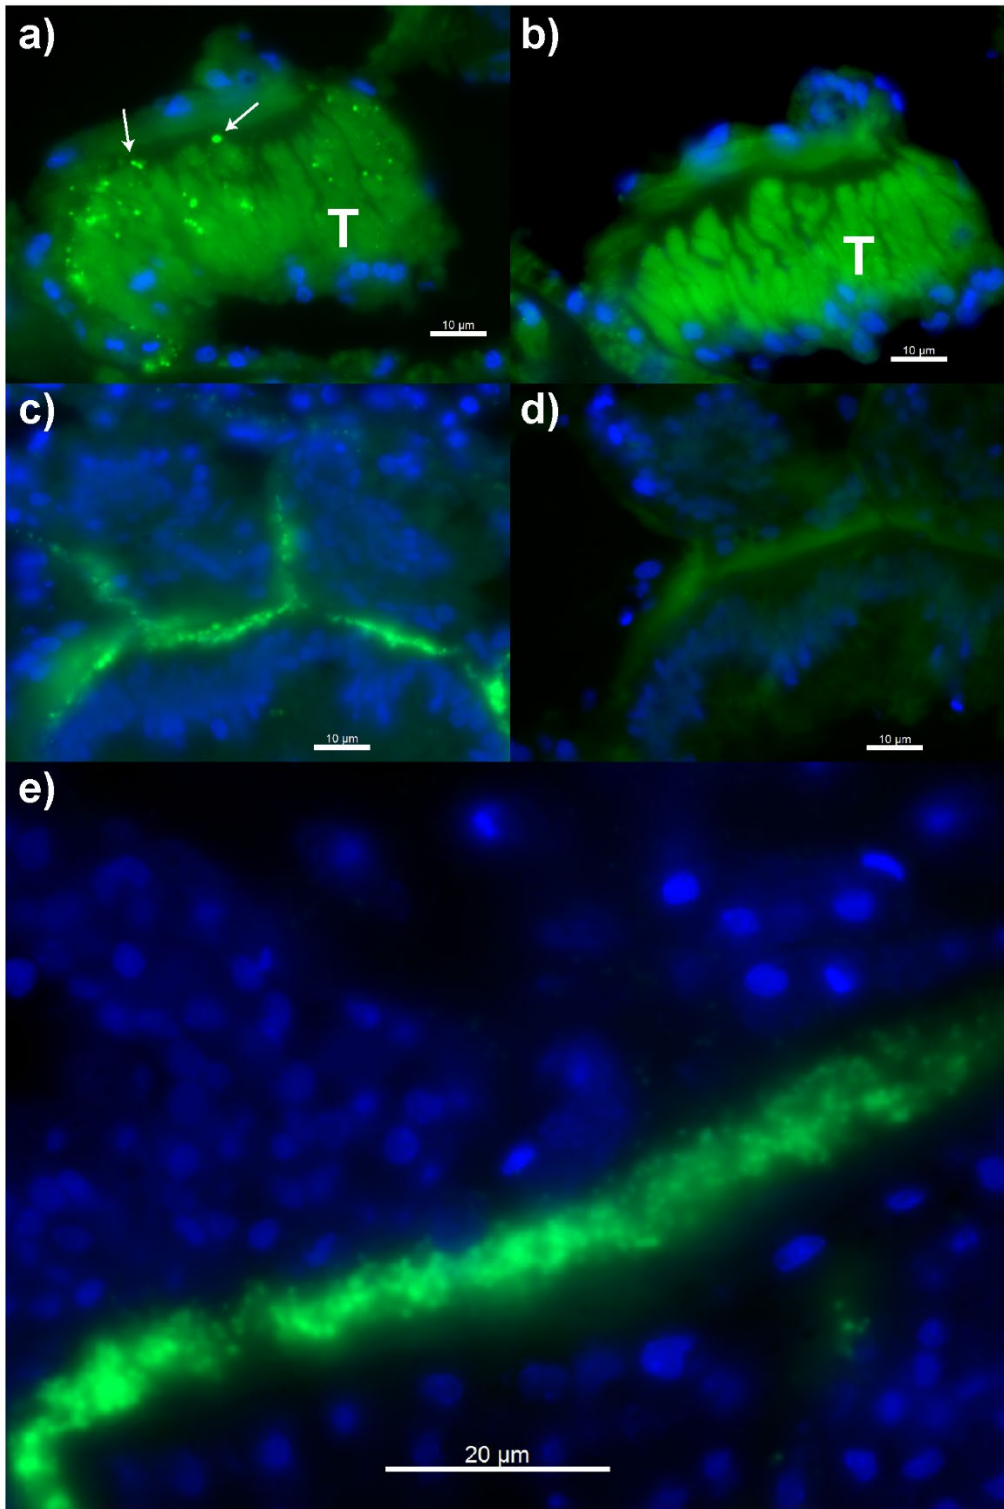

Fig. S5: Adjacent section comparisons at higher magnification

Tissue sections were hybridized using CARD-FISH with the general eubacterial probe mix (EUB338 I-III) and DNA was stained with DAPI. Fluorescence in the emission range of DAPI is shown in blue while green shows emission in the range of the fluorophore ALEXA 488 used by both EUB338 I-III and control probes. Paired images compare adjacent sections where sections on the left were hybridized with EUB338 I-III and show bacterial signals (a,c,e) while sections on the right were hybridized with a negative control probe and only show autofluorescence (b,d). Transverse sections through a polyp (a,b) show EUB338 I-III fluorescence (a, arrows) in the base of a tentacle seen in only 1 of 5 colonies. Transverse sections through the body wall of a polyp show granular ( $<1\mu\text{m}$ ) EUB338 I-III fluorescence in the mesoglea (c-e) seen in 4 of 5 colonies. T = tentacle. Scale bars = 10  $\mu\text{m}$  (a-d), 20  $\mu\text{m}$  (e)
